# Supplementary material for: Sex differences in subjective age-associated changes in sleep: a prospective elderly cohort study
Source: publisher site journal article supplement (doi:10.18632/aging.104016), 2020-11-07
Supplement: Supplementary file [file aging-v12i21-104016-supplementary-material-SD1.pdf]

**SUPPLEMENTARY FIGURE**

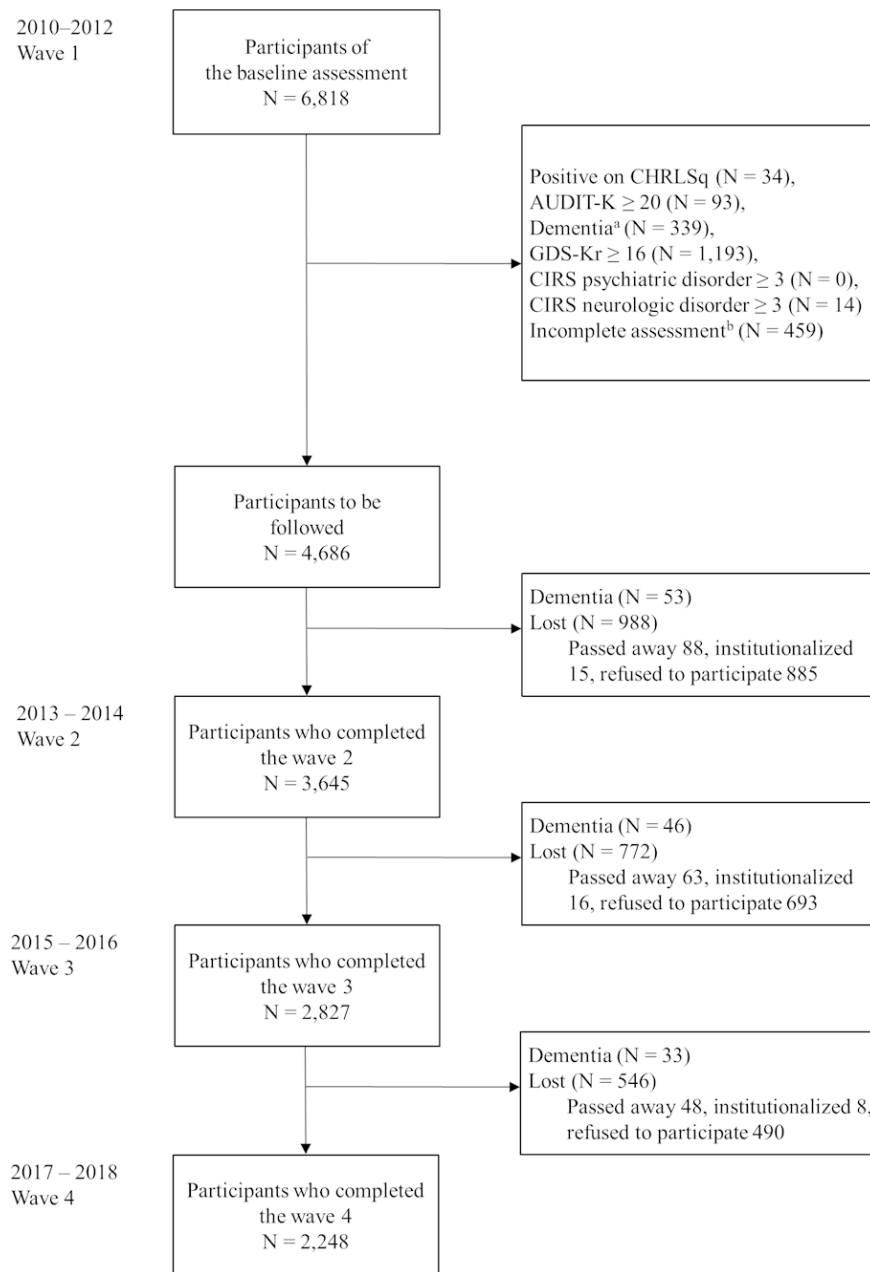

**Supplementary Figure 1. Flow chart of the study.** <sup>a</sup>Diagnosed according to the fourth edition of the Diagnostic and Statistical Manual of Mental Disorders, Text Revision (DSM-IV-TR) <sup>b</sup>Incomplete assessment of PSQI Abbreviation: PSQI, Pittsburgh Sleep Quality Index; CHRLSq, Cambridge-Hopkins diagnostic questionnaire for restless legs syndrome; AUDIT-K, Alcohol Use Disorders Identification Test – Korean version; GDS-Kr, Korean version of the geriatric depression scale; CIRS, Cumulative Illness Rating Scale.
